# Supplementary material for: Patterns of social media platforms co-use and social media addiction among secondary school students: findings from Thailand’s fifth national school students survey with latent class analysis
Source: publisher site journal article supplement (doi:10.1515/ijamh-2025-0163), 2025-11-26
Supplement: Supplementary file 1 [file j_ijamh-2025-0163_suppl_001.docx]

# **Supplementary Table 1.** Distribution of demographic variables by latent class

Main differences in sex distribution and class level. No meaningful differences in religion, accommodation, etc.

| **Characteristic** | **“Basic Combo” Class I**  **(n=8855)** | **“Basic Combo Plus” Class II**  **(n=10497)** | **P value** |
| --- | --- | --- | --- |
| **Gender** |  |  | **< 0.001** |
| Female | 46.4%**±**2.3% | 71.9%**±**2.2% |  |
| Male | 53.6%**±**2.3% | 28.1%**±**2.2% |  |
| Class and School |  |  | **< 0.001** |
| M1 | 41.5%±4.0% | 29.6%±3.9% |  |
| M3 | 33.3%±3.1% | 38.0%±4.7% |  |
| M5 | 21.6%±6.3% | 30.3%±8.3% |  |
| Vocational 2 | 3.7%±1.4% | 2.1%±0.9% |  |
| Age (year): median(IQR) | 16.3 ± 0.3 | 16.5 ± 0.3 | < 0.001 |
| **Religion** |  |  | 0.045 |
| Buddhism | 85.0%±4.2% | 87.1%±2.7% |  |
| Islam | 11.4%±4.2% | 8.5%±2.8% |  |
| Christianity | 2.8%±1.1% | 2.7%±0.7% |  |
| Other | 0.4%±0.1% | 1.2%±0.1% |  |
| Unknown | 0.4%±0.1% | 0.5%±0.1% |  |
| **Accommodation** |  |  | 0.285 |
| Family house/flat | 86.2%±1.9% | 86.9%±1.8% |  |
| School dormitory | 2.9%±1.0% | 1.9%±0.6% |  |
| Dormitory/rental house/non-family accommodation | 9.4%±1.4% | 9.9%±1.5% |  |
| Others | 1.1%±0.2% | 0.8%±0.2% |  |
| Unknown | 0.5%±0.1% | 0.4%±0.1% |  |
| **Stay with** |  |  |  |
| Stay alone | 1.3%±0.2% | 1.7%±0.3% | 0.188 |
| Father and Mother | 68.4%±1.5% | 66.3%±0.8% | 0.185 |
| Father | 5.3%±0.4% | 4.9%±0.2% | 0.320 |
| Mother | 12.1%±0.9% | 14.2%±0.5% | 0.016 |
| Relatives | 20.8%±1.2% | 24.8%±1.3% | 0.001 |
| Friend/Boyfriend/Girlfriend/others | 9.7%±1.3% | 8.9%±1.0% | 0.306 |
| **Grade** |  |  | < 0.001 |
| 0.00 to 0.99 | 0.1%±0.0% | 0.1%±0.0% |  |
| 1.00 to 1.99 | 4.3%±0.4% | 1.7%±0.2% |  |
| 2.00 to 2.99 | 34.4%±1.7% | 19.5%±1.8% |  |
| 3.00 to 3.99 | 61.3%±1.7% | 78.8%±1.8% |  |
| **Academic results** |  |  | 0.070 |
| Same | 15.6%±1.1% | 13.1%±1.0% |  |
| Better | 48.7%±2.0% | 51.1%±2.3% |  |
| Worse | 30.7%±1.8% | 31.1%±2.0% |  |
| unknown | 5.0%±0.5% | 4.6%±0.6% |  |
| Allowance / week (bath) : median(IQR) | 440.2±14.9 | 519.4±17.7 | < 0.001 |
| Work to earn income | 31.3%±1.4% | 29.0%1.5% | 0.166 |
| Ever punished with suspension from school | 1.2%±0.2% | 1.1%±0.2% | 0.006 |
| There is a tendency to have to leave school before completing M.3 or a vocational certificate. | 8.4%±1.0% | 5.3%±0.7% | < 0.001 |
| **Exercise in last semester** |  |  | < 0.001 |
| No exercise | 18.8%±1.2% | 18.7%±1.2% |  |
| 1-2 days/week | 46.6%±1.0% | 53.1%±0.9% |  |
| 3-4 days/week | 19.6%±0.8% | 17.9%±0.9% |  |
| 5-7 days/week | 14.1%±1.1% | 9.9%±0.8% |  |
| unknown | 0.9%±0.2% | 0.4%±0.1% |  |
| **Night sleep (hrs.)** |  |  | < 0.001 |
| <= 4 hours | 6.2%±0.4% | 8.9%±0.7% |  |
| 5 hours | 11.6%±0.7% | 16.8%±0.7% |  |
| 6 hours | 20.9%±0.8% | 27.4%±0.9% |  |
| 7 hours | 29.6%±0.8% | 25.3%±0.7% |  |
| 8 hours | 24.8%±1.1% | 17.2%±0.9% |  |
| 9 hours | 4.5%±0.4% | 2.5%±0.3% |  |
| >=10 hours | 1.4%±0.1% | 1.3%±0.2% |  |
| unknown | 1.1%±0.3% | 0.6%±0.2% |  |
